# Supplementary material for: Miniature supercapacitors composed of nickel/cobalt hydroxide on nickel-coated silicon microchannel plates
Source: Royal Society of Chemistry journal article supplement (doi:10.1039/c1jm14031k), 2011-01-01
Supplement: c1jm14031k.pdf [file c1jm14031k.pdf]

## Electronic Supplementary Information (ESI)

# Miniature Supercapacitors Composed of Nickel/Cobalt Hydroxide on Nickel-Coated Silicon Microchannel Plates

Tao Liu<sup>ad</sup>, Shaohui Xu<sup>a</sup>, Lianwei Wang<sup>ad\*1</sup>, Junhao Chu<sup>a</sup>, Qingjiang Wang<sup>b</sup>, Xiangrong Zhu<sup>c</sup>, Naici Bing<sup>c</sup>, Paul K. Chu<sup>d\*2</sup>

<sup>a</sup> Key Laboratory of Polar Materials and Devices, Ministry of Education, and Department of Electronic Engineering, East China Normal University, 500 Dongchuan Road, Minhang District, Shanghai 200241, China.

<sup>b</sup> Department of Chemistry, East China Normal University, Shanghai 200241, China.

<sup>c</sup> School of Urban Development and Environmental Engineering, Shanghai Second Polytechnic University, Shanghai 201209, China.

<sup>d</sup> Department of Physics and Materials Science, City University of Hong Kong, Tat Chee Avenue, Kowloon, Hong Kong, China.

\*1 Corresponding author - Lianwei Wang: Fax: 86-21-54345119; Tel: 86-21-54345160; E-mail: lwwang@ee.ecnu.edu.cn

\*2 Corresponding author - Paul K. Chu: Fax: 852-34420542 or 852-34420538; Tel: 852-34427724; E-mail: paul.chu@cityu.edu.hk

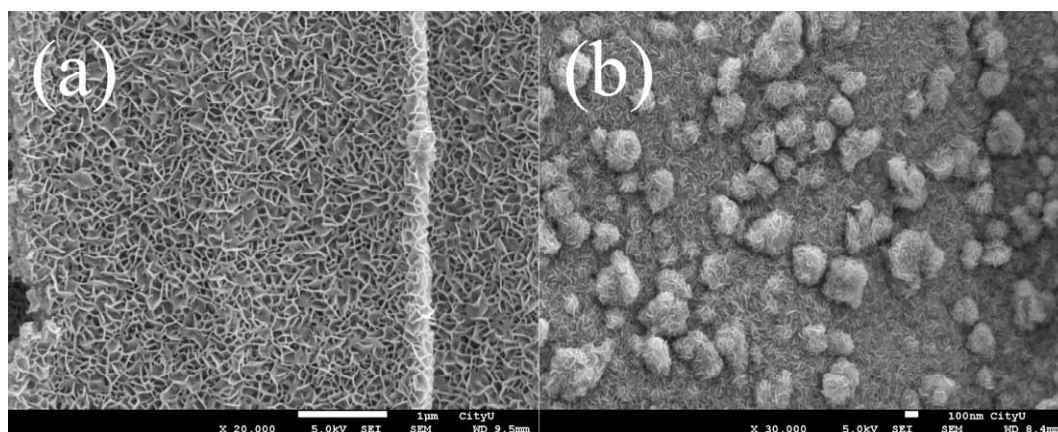

**Fig. S1** The morphology of the active materials after 2000 cycles measurements: (a) Ni(OH)<sub>2</sub> on the side-wall; (b) Co(OH)<sub>2</sub> on the side wall.
